# Supplementary material for: Human Sulfotransferases and Their Role in Chemical Metabolism
Source: Oxford University Press journal article supplement (doi:10.1093/toxsci/kfj061), 2005-12-01
Supplement: kfj061_Supplementary_Data.zip [file kfj061_Supplementary_Data.zip]

Archive with 3 entries (3 files):
- kfj061supp.pdf
- kfj061supp.doc
- kfj061supp2.pdf
