# Supplementary material for: Human Sulfotransferases and Their Role in Chemical Metabolism
Source: Oxford University Press journal article supplement (doi:10.1093/toxsci/kfj061), 2005-12-01
Supplement: kfj061_Supplementary_Data.zip [file kfj061_Supplementary_Data.zip › kfj061supp.pdf]

## References

Abenhaim, L., Romain, Y., and Kuchel, O. (1981). Platelet phenolsulfotransferase and catecholamines: physiological and pathological variations in humans. *Can.J. Physiol. Pharmacol.* **59**, 300-306.

Aksoy, I. A, and Weinshilboum, R. M. (1995). Human thermolabile phenol sulfotransferase gene (STM) molecular cloning and structural characterization. *Biochem. Biophys. Res. Commun.* **208**, 786-795.

Anderson, R. J., Babbitt, L.L, and Liebentritt, D. K. (1995). Human liver triiodothyronine sulfotransferase: copurification with phenol sulfotransferases. *Thyroid.* **5**, 61-66.

Baker, E. V., Hume, R., Hallas, A., and Coughtrie, M.W.H. (1994). Dehydroepiandrosterone sulfotransferase in the developing human fetus: quantitative biochemical and immunological characterization of the hepatic, renal and adrenal enzymes. *Endocrinol.* **134**, 982-989.

Banoglu, E. (2000). Current status of the cytosolic sulfotransferases in the metabolic activation of promutagens and procarcinogens. *Curr. Drug Metab.* **1**, 1-30.

Bernier, F., Lopez Solache, I., Labrie, F. and Luu-The, V. (1994a). Cloning and expression of cDNA encoding human placental estrogen sulfotransferase. *Mol. Cell Endocrinol.* **99**, 11-15.

Bernier, F., Leblanc, G., Labrie, F., and Luu-The V. (1994b). Structure of human estrogen and aryl sulfotransferase gene. Two mRNA species issued from a single gene. *J.Biol. Chem.* **269**, 28200-28205.

Bernier, F., Soucy, P., and Luu-The V. (1996). Human phenol sulfotransferase gene contains two alternative promoters: Structure and expression of the gene. *DNA and Cell Biol.* **15**, 367-375.

Burchell, B., and Coughtrie, M. W. H. (1997). Genetic and Environmental Factors Associated with variation of human xenobiotic glucoronidation and sulfation. *Environ. Health Perspect.* **105**(Supplement 4), 739-747.

Cappiello, M., Giuliani, L., Rane, A., and Pacifici, G.M. (1991). Dopamine sulphotransferase is better developed than *p*-nitrophenol sulphotransferase in the human fetus. *Dev. Pharmacol. Ther.* **16**, 83-8.

Chang, H. J., Shi, R., Rehse, P., and Lin, S. X. (2003). Identifying ADT as a cognate substrate for DHEA-ST important for steroid homeostasis: structure of the enzyme-ADT complex. *J.Biol.Chem.* **23**, 2689-2696.

Chetrite, G. S., and Pasqualini, J. R. (2001). The selective estrogen enzyme modulator (SEEM) in breast cancer. *J. Steroid Biochem. Mol. Biol.* **76**, 95-104.

Cheek, A. O., Vonier, P.M., Oberdorster, E., Burrow, B.C., and McLachlan, J.A. (1998). Environmental signaling; a biological context for endocrine disruption. *Environ. Health Perspect.* **106**, 5-10.

Chiba, H., Komatsu, K., Lee, Y.C., Tomizuka, T., and Strott, C.A. (1995). The 3'-terminal exon of the family of steroid and phenol sulfotransferase genes is spliced at the N-terminal glycine of the universally conserved GXXGXXK motif that forms the sulfonate donor binding site. *Proc. Nat. Acad. Sci. USA.* **92**, 8176-8179.

Collier, A.C., Ganley, N.A., Tingle, M.D., Blumenstein, M., Marvin, K. W., Paxton, J.W., Mitchell, M.D., and Keelan, J.A. (2002). UDP-glucuronosyltransferase activity, expression and cellular localization in human placenta at term. *Biochem .Pharmacol.* **63**, 409-19.

Comer, K. A., and C. N. Falany (1992). Immunological characterization of dehydroepiandrosterone sulfotransferase from human liver and adrenal. *Mol. Pharmacol.* **41**, 645-651.

Comer, K. A., Falany, J. L., and Falany, C. N (1993). Cloning and expression of human liver dehydroepiandrosterone sulfotransferase. *Biochem. J.* **289**, 233-240.

Coughtrie, M. W. H. (1998). Catecholamine sulfation in health and disease. *Advances Pharmacol.* **42**, 339-342.

Coughtrie, M.W., and Johnston, L.E. (2001). Interactions between dietary chemicals, human sulfotransferases-molecular mechanisms and clinical significance. *Drug Metab. Dispos.* **29**, 522-528.

Coughtrie, M.W. (2002). Sulfation through the looking glass-recent advances in sulfotransferase research for the curious. *Pharmacogenomics J.* **2**, 297-308.

Cramer, J.W., Miller, J.A., and Miller, E.C. (1960). N-Hydroxylation: A new metabolic reaction observed in the rat with the carcinogen 2-acetylaminofluorene. *J. Biol. Chem.* **235**, 885-888.

Dajani, R., Hood, A.M., and Coughtrie, M.W. (1998). A single amino acid, glu146, governs the substrate specificity of a human dopamine sulfotransferase, SULT1A3. *Mol. Pharmacol.* **54**, 942-948.

Dajani, R., Sharp, S., Graham, S., Bethell, S.S., Cooke, R.M., Jamieson, D.J. and Coughtrie, M.W. (1999b). Kinetic properties of human dopamine sulfotransferase (SULT1A3) expressed in prokaryotic and eukaryotic systems: comparison with the recombinant enzyme purified from Escherichia coli. *Protein Expr. Purif.* **16**, 11-18.

DeBaun, J.R., Rowley, J.Y., Miller, E.C., and Miller, J.A. (1968). Sulfotransferase activation of N-hydroxy-2-acetylaminofluorene in rodent livers susceptible and resistant to this carcinogen. *Proc Soc Exp Biol Med.* **129**, 268-273.

DeBaun, J.R., Miller, E.C., and Miller, J.A. (1970). N-hydroxy-2-acetylaminofluorene sulfotransferase: its probable role in carcinogenesis and in protein-(methion-S-yl) binding in rat liver. *Cancer Res.* **30**, 577-595.

Deng, W. H., Wu, Y. Y., Luo, L. H., Wang, S., Tang, W. Q., and Zhang, Y. F. (2003). Expression of estrogen sulfotransferase in breast tissues and the regulation of ESTmRNA by estrogen. *Zhonghua Yi Xue Za Zhi.* **83**, 1891-1894.

Dooley, T.P., Probst, P., Munroe, P.B., Mole, S.E., Liu, Z., and Doggett, N.A. (1994). Genomic organization and DNA sequence of the human catecholamine-sulfating phenol sulfotransferase gene (*STM*). *Biochem. Biophys. Res. Commun.* **205**, 1325-1332.

Dooley, T. P., and Huang, Z. (1996). Genomic organization and DNA sequences of two human phenol sulfotransferase genes (*STP1* and *STP2*) on the short arm of chromosome 16. *Biochem. Biophys. Res. Comm.* **228**, 134-140.

Dooley, T.P. (1998a). Molecular biology of the human phenol sulfotransferase gene family. *J. Exp. Zoology.* **282**, 223-230.

Dooley T.P (1998b). Cloning of the human phenol sulfotransferase gene family: three genes implicated in the metabolism of catecholamines, thyroid hormones and drugs. *Chemico-Biological Interact.* **109**, 29-41.

Driscoll, W.J., Komatsu, K., and Strott, C.A. (1995). Proposed active site domain in estrogen sulfotransferase as determined by mutational analysis. *Proc. Nat Acad. Sci. USA*. **92**, 12328-32.

Duanmu, Z., Locke, D., Smigelski, J., Wu, W., Dahn, M.S., Falany, C.N., Kocarek, T.A., and Runge-Morris, M. (2002b). Effects of dexamethasone on aryl (SULT1A1) and hydroxysteroid (SULT2A1)-sulfotransferase gene expression in primary cultured human hepatocytes. *Drug Metab. Dispos.* **30**, 997-1004.

Dunham, I., Shimizu, N., Roe, B.A., Chisoe, S., Hunt, A.R., Collins, J.E., Bruskiewich, R., and Beare, D.M., *et al.* (1999). The DNA sequence of human chromosome 22. *Nature*. **402**, 489-95.

Eisenhofer, G., Coughtrie, M.W., and Goldstein, D.S. (1999). Dopamine sulphate: an enigma resolved. *Clin. Exp. Pharmacol. Physiol.* **26**, 41-S53.

Falany, C.N., Krasnykh, V., and Falany, J. L. (1995). Bacterial expression and characterization of a cDNA for human liver estrogen sulfotransferase. *J. Steroid Biochem. Molec. Biol.* **52**, 529-539.

Falany, J.L., and Falany, C.N. (1996). Regulation of estrogen sulfotransferase in human endometrial adenocarcinoma cells by progesterone. *Endocrinol.* **137**, 1395-1401.

Falany, J. L., Azziz, R., and Falany, C. N (1998). Identification and characterization of cytosolic sulfotransferases in normal human endometrium. *Chem. Biol. Interact.* **109**, 329-39.

Forbes-Bamforth, K. J., and M. W. H. Coughtrie (1994). Identification of a new adult human liver sulfotransferase with specificity for endogenous and xenobiotic estrogens. *Biochem. Biophys. Res. Commun.* **198**, 707-711.

Forbes, K. J., Hagen, M., Glatt, H., Hume, R., and Coughtrie, M.W.H. (1995). Human fetal adrenal hydroxysteroid sulphotransferase: cDNA cloning, stable expression in V79 cells and functional characterisation of the expressed enzyme. *Mol. Cell. Endocrinol.* **112**, 53-60.

Francis, G. A., Fayard, E., Picard, F., and Auwerx, J. (2003). Nuclear receptors and the control of metabolism. *Ann. Rev. Physiol.* **65**, 261-311.

Freimuth, R. R., Raftogianis, R. B., Wood, T. C., Moon, E., Kim, U. J., Xu, J., Siciliano, M. J., and Weinshilboum, R. M. (2000). Human sulfotransferases SULT1C1 and SULT1C2: cDNA characterization, gene cloning, and chromosomal localization. *Genomics* **65**, 157-165.

Fujita, K., Nagata, K., Ozawa, S., Sasano, H., and Yamazoe, Y. (1997). Molecular cloning and characterization of rat ST1B1 and human ST1B2 cDNAs, encoding thyroid hormone sulfotransferases. *J. Biochem. (Tokyo)* **122**, 1052-61.

Gaedigk, A., Beatty, B.G., and Grant, D.M. (1997). Cloning, structural organization, and chromosomal mapping of the human phenol sulfotransferase *STP2* gene. *Genomics*. **40**, 242-246.

Ganguly, T.C., Krasnykh, V. and Falany, C.N. (1995). Bacterial expression and kinetic characterization of the human monoamine-sulfating form of phenol sulfotransferase. *Drug. Metab. Dispos.* **23**, 945-950.

Geese, W. J., and R. B. Raftogianis (2001). Biochemical characterization and tissue distribution of human SULT2B1. *Biochem. Biophys. Res. Commun.* **288**, 280-289.

Glatt, H. (1997). Bioactivation of mutagens via sulfation. *FASEB J.* **11**, 314–321.

Glatt, H., Bartsch, I., Christoph, S., Coughtrie, M. W., Falany, C. N., Hagen, M., Landsiedel, R., Pabel, U., Phillips, D. H., and Seidel, A., Yamazoe, Y. (1998). Sulfotransferase-mediated activation of mutagens studied using heterologous expression systems. *Chem. Biol. Interact.* **109**, 195-219.

Glatt, H., Boeing, H., Engelke, C.E., Ma, L., Kuhlow, A., Pabel, U., Pomplun, D., Teubner, W., and Meinl, W. (2001). Human cytosolic sulphotransferases: genetics, characteristics, toxicological aspects. *Mutation Res.* **482**, 27-40.

Glatt, H., and Meinl, W. (2004). Pharmacogenetics of soluble sulfotransferases (SULTs). *Naunyn-Schmiedeberg's Arch .Pharmacol.* **369**, 55–68.

Glatt, H. (2005). Activation and Inactivation of Carcinogens and Mutagens by Human sulfotransferases. In Human cytosolic sulfotransferases (G.M Pacifici and M.W. Coughtrie, Eds.), pp.279-304. CRC Press, USA.

Hart, R. F., Renskers, K.J., Nelson, E.B. and Roth, J.A. (1979). Localization and characterization of phenol sulfotransferase in human platelets. *Life Sci.* **24**, 125-130.

Her, C., Aksoy, I.A., Kimura, S., Brandriff, B.F., Wasmuth, J.J., and Weinshilboum, R.M. (1995). Human estrogen sulfotransferase gene (*STE*): Cloning, structure, and chromosomal localization. *Genomics*. **29**, 16-23.

Her, C., Raftogianis, R., and Weinshilboum, R. (1996a). Human phenol sulfotransferase *STP2* gene: Molecular cloning, structural characterization, and chromosomal localization. *Genomics* **33**, 409-420.

Her, C., Wood, T.C., Eichler, E.E., Mohrenweiser, H.W., Ramagli, L.S., Siciliano, M.J. and Weinshilboum, R.M. (1998). Human hydroxysteroid sulfotransferase SULT2B1: Two enzymes encoded by a single chromosome 19 gene. *Genomics*. **53**, 284-295.

Heroux, J. A., Falany, C.N. and Roth, J.A. (1989). Immunological characterization of human phenol sulfotransferase. *Mol. Pharmacol.* **36**, 29-33.

Hwang, S.R., Kohn, A.B., and Hook, V.Y.H. (1995). Molecular cloning of an isoform of phenol sulfotransferase from human brain hippocampus. *Biochem. Biophys. Res. Commun.* **207**, 701-707.

Javitt, N. B., Lee, Y. C., Shimizu, C., Fuda, H., and Strott, C. A. (2001). Cholesterol and hydroxycholesterol sulfotransferases: identification, distinction from dehydroepiandrosterone sulfotransferase, and differential tissue expression. *Endocrinol.* **142**, 2978-2984.

Jones, A.L., Hagen, M., Coughtrie, M.W., Roberts, R.C., and Glatt, H. (1995). Human platelet phenolsulfotransferases: cDNA cloning, stable expression in V79 cells and identification of a novel allelic variant of the phenol-sulfating form. *Biochem. Biophys. Res. Commun.* **208**, 855-862.

Jones, G., Willett, P., Glen, R. C., Leach, A. R., and Taylor, R. (1997). *J. Mol.Biol.* **267**, 727-748.

Kakuta, Y., Sueyoshi, T., Negishi, M., and Pedersen, L.C. (1999). Crystal structure of the sulfotransferase domain of human heparan sulfate N-deacetylase/ N-sulfotransferase 1. *J. Biol. Chem.* **274**, 10673-10676.

Kauffman, F.C. (2004). Sulfonation in pharmacology and toxicology. *Drug Metab. Rev.* **36**, 823-843.

Kester, M.H., Kaptein, E., Roest, T.J., van Dijk, C.H., Tibboel, D., Meinl, W., Glatt, H., Coughtrie, M.W., and Visser, T.J. (1999). Characterization of human iodothyronine sulfotransferases. *J. Clin. Endocrinol. Metab.* **84**, 1357-1364.

Kester, M.H., Bulduk, S., Tibboel, D., Meinl, W., Glatt, H., Falany, C.N., Coughtrie, M.W., Bergman, A., Safe, S.H., Kuiper, G.G., Schuur, A.G., Brouwer, A., and Visser, T.J. (2000). Potent inhibition of estrogen sulfotransferase by hydroxylated PCB metabolites: a novel pathway explaining the estrogenic activity of PCBs. *Endocrinol.* **141**, 1587-1589.

King, C.M., and Phillips, B. (1968). Enzyme-catalyzed reactions of the carcinogen N-hydroxy-2-fluorenylacetamide with nucleic acid. *Science* **159**, 1351-1353.

Kong, A.-N. T., Yang, L., Ma, M., Tao, D., and Bjornsson, T.D. (1992). Molecular cloning of the alcohol/hydroxysteroid form (*hST<sub>a</sub>*) of sulfotransferase from human liver. *Biochem. J. Biophys. Res. Commun.* **187**, 448-454.

Lampen, A., Ebert, B., Stumkat, L., Jacob, J., and Seidel, A. (2004). Induction of gene expression of xenobiotic metabolism enzymes and ABC-transport proteins by PAH and a reconstituted PAH mixture in human Caco-2 cells. *Biochim. Biophys. Acta.* **1681**, 38-46.

Lewis, A.J., Kelly, M.M., Walle, U.K., Eaton, E.A., Falany, C.N. and Walle, T. (1996). Improved bacterial expression of the human P form phenolsulfotransferase. Applications to drug metabolism. *Drug. Metab. Dispos.* **24**, 1180-1185.

Li, X., Clemens, D.L., Cole, J.R., and Anderson, R.J. (2001). Characterization of human liver thermostable phenol sulfotransferase (SULT1A1) allozymes with 3,3',5-triiodothyronine as the substrate. *J. Endocrinol.* **171**, 525-32.

Lin, Z., Lou, Y. and Squires, J.E. (2004). Molecular cloning and functional analysis of porcine SULT1A1 gene and its variant: a single mutation SULT1A1 causes a significant decrease in sulfation activity. *J. Mamm. Genome.* **15**, 218-226.

Liyou, N. E., Buller, K. M., Tresillian, M. J., Elvin, C. M., Scott, H. L., Dodd, P. R., Tannenber, A. E., and McManus, M. E. (2003). Localization of a brain sulfotransferase, SULT4A1, in the human and rat brain: an immunohistochemical study. *J. Histochem. Cytochem.* **51**, 1655-1664.

Lu, J.H., Li, H.T., Liu, M.C., Zhang, J.P., and Li, M., An, X. N., and Chang W.R. (2005). Crystal structure of human sulfotransferase SULT1A3 in complex with dopamine and 3'-phosphoadenosine 5'-phosphate. *Biochem. Biophys. Res. Comm.* **335**, 417-423.

Luu-The, V., Dufort, I., Paquet, N., Reimnitz, G., and Labrie, F. (1995). Structural characterization and expression of the human dehydroepiandrosterone sulfotransferase gene. *DNA and Cell Biol.* **14**, 511-518.

Maiti, S., Chen, X., and Chen, G. (2005). All-trans retinoic acid induction of sulfotransferases. *Basic Clin Pharmacol Toxicol* **96**, 44-53.

Mammalian Gene Collection (MGC) Team (2002). Generation and Initial analysis of more than 15, 000 full- lengths human and mouse cDNA sequences. *Proc. Natl. Acad. Scien. USA.* **99**, 16899-16903.

Meisheri, K.D., Johnson, G.A., and Puddington, L. (1993). Enzymatic and non-enzymatic sulfation mechanisms in the biological actions of minoxidil. *Biochem. Pharmacol.* **45**, 271-9.

Meloche, C. A. and C. N. Falany (2001). Expression and characterization of the human 3 beta-hydroxysteroid sulfotransferases (SULT2B1a and SULT2B1b). *J. Steroid Biochem. Mol. Biol.* **77**, 261-269.

Michejda, C.J., Kroeger, A., and Koepke, M.B. (1994). Carcinogen activation by sulfate conjugate formation. *Adv. Pharmacol.* **27**, 331-363.

Miller, E.C. (1978). Some current perspectives on chemical carcinogenesis in humans and experimental animals: Presidential Address. *Cancer Res.* **38**, 1479-96.

Moon, A. F., Edavettal, S. C., Krahn, J. M., Munoz, E. M., Negishi, M., Linhardt, R. J., Liu, J., and Pedersen, L. C. (2004). Structural Analysis of the Sulfotransferase (3-O Sulfotransferase Isoform 3) Involved in the Biosynthesis of an Entry Receptor for Herpes Simplex Virus 1. *J. Biol. Chem.* **279**, 45185-45193.

Nash, A. R., Glenn, W. K., Moore, S.S., Kerr, J., Thompson, A.R., and Thompson, E.O. (1988). Oestrogen sulfotransferase: Molecular cloning and sequencing of cDNA

for the bovine placental enzyme. *Australian Journal of Biological Science* **41**, 507-516.

Nowell, S., Green, B., Tang, Y.M., Wiese, R., and Kadlubar, F.F. (2005). Examination of human tissue cytosols for expression of sulfotransferase isoform 1A2 (SULT1A2) using a SULT1A2-specific antibody. *Mol. Pharmacol.* **67**, 394-399.

Otterness, D. M., Wieben, E. D., Wood, T. C., Watson, W. G., Madden, B. J., McCormick, D. J., and Weinshilboum, R. M. (1992). Human liver dehydroepiandrosterone sulfotransferase: molecular cloning and expression of cDNA. *Mol. Pharmacol.* **41**, 865-872.

Otterness, D.M., Her, C., Aksoy, S., Kimura, S., Wieben, E.D., and Weinshilboum, R.M. (1995). Human dehydroepiandrosterone sulfotransferase gene: molecular cloning and structural characterization. *DNA Cell Biol.* **14**, 331-341.

Ozawa, S., Nagata, K., Gong, D. W., Yamazoe, Y., and Kato, R. (1990). Nucleotide sequence of a full-length cDNA (PST-1) for aryl sulfotransferase from rat liver. *Nucleic Acids Res.* **18**, 4001.

Ozawa, S., Chou, H.C., Kadlubar, F.F., Nagata, K., Yamazoe, Y. and Kato, R. (1994). Activation of 2-hydroxyamino-1-methyl-6-phenylimidazo[4,5-b] pyridine by cDNA-expressed human and rat arylsulfotransferases. *Jpn. J. Cancer Res.* **85**, 1220-1228.

Pacifici, G. M., and Marchi, G. (1993). Interindividual variability of phenol- and catechol-sulphotransferases in platelets from adults and newborns. *Brain J. Clin. Pharmacol.* **36**, 593-597.

Pacifici, G. M. and De'santi, C. (1995). Human sulfotransferases. Classification and metabolic profile of the major isoforms. The point of view of the clinical pharmacologist. In *Medicine and Health. Advances in Drug Metabolism in Man* (G. M. Pacifici and G. N. Fracchia, Eds.), pp. 312-349. European Commission, Belgium.

Pacifici, G.M., Quilici, M.C., Giulianetti, B., Spisni, R., Nervi, M., Giuliani, I., and Gomeni, R. (1998) Ritodrine sulfation in the human liver and duodenal mucosa: interindividual variability'. *Eur. J. Drug Metab. Pharmacokin.* **23**, 67-74.

Pedersen, L.C., Petrotchenko, E.V., and Negishi, M. (2000). Crystal structure of SULT2A3, human hydroxysteroid sulfotransferase. *FEBS Lett.* **475**, 61-64.

Qian, Y.N., Sun, X.J., Tong, M.H., Li, X.P., Richa, J., and Song, W.C. (2001). Targeted disruption of the mouse estrogen sulfotransferase gene reveals a role of estrogen metabolism in intracrine and paracrine estrogen regulation. *Endocrinol.* **142**, 5342-50.

Radomska, A., Comer, K. A., Zimniak, P., Falany, J., Iscan, M., and Falany, C. N. (1990). Human liver steroid sulphotransferase sulphates bile acids. *Biochem. J.* **272**, 597-604.

Raftogianis, R.B., Her, C., and Weinshilboum, M. (1996). Human phenol sulfotransferase pharmacogenetics: *STPI\** gene cloning and structural characterization. *Pharmacogenetics* **6**, 473-487.

Rehse, P., Zhou, M., and Lin, Sheng-Xiang (2002). Crystal structure of human dehydroepiandrosterone sulfotransferase in complex with substrate. *Biochem. J.* **364**, 165-171.

Reiter, C., Mwaluko, G., Dunnette, J., Van Loon, J., and Weinshilboum, R. (1983). Thermolabile and thermostable human platelet phenol sulfotransferase. Substrate specificity and physical separation. *Naunyn Schmiedebergs Arch.Pharmacol.* **324**, 140-147.

Richard, K., R. Hume, R., Kaptein, E., Stanley, E. L., Visser, T. J., and Coughtrie, M. W. (2001). Sulfation of thyroid hormone and dopamine during human development: ontogeny of phenol sulfotransferases and arylsulfatase in liver, lung, and brain. *J. Clin. Endocrinol. Metab.* **86**, 2734-2742.

Rubin, G.L., Harrold, A.J., Mills, J.A., Falany, C.N., and Coughtrie, M.W. (1999). Regulation of sulphotransferase expression in the endometrium during the menstrual cycle, by oral contraceptives and during early pregnancy. *Mol. Hum. Reprod.* **5**, 995-1002.

Saini, S. P., Sonoda, J., Xu, L., Toma, D., Uppal, H., Mu, Y., Ren, S., Moore, D. D., Evans, R. M., and Xie, W. (2004). A Novel Constitutive Androstane Receptor-

Mediated and CYP3A-Independent Pathway of Bile Acid Detoxification. *Mol. Pharmacol.* **65**, 292-300.

Sakakibara, Y., Yanagisawa, K., Takami, Y., Nakayama, T., Suiko, M., and Liu, M. C. (1998a). Molecular cloning, expression, and functional characterization of novel mouse sulfotransferases. *Biochem. Biophys. Res. Commun.* **247**, 681-686.

Sakakibara, Y., Yanagisawa, K., Katafuchi, J., Ringer, D.P., Takami, Y., Nakayama, T., Suiko, M., and Liu, M.-C. (1998b). Molecular cloning, expression, and characterization of novel human SULT1C sulfotransferases that catalyze the sulfonation of *N*-hydroxy-2-acetylaminofluorene. *J. Biol. Chem.* **273**, 33929-33935.

Sakakibara, Y., Suiko, M., Pai, T. G., Nakayama, T., Takami, Y., Katafuchi, J., and Liu, M. C. (2002). Highly conserved mouse and human brain sulfotransferases: molecular cloning, expression, and functional characterization. *Gene*. **285**, 39-47.

Schlessinger, J. (2002). Lignad-induced, receptor- mediated dimerization and activation of EGF receptor. *Cell* **110**, 669-672.

Schwartz, N.B. (2005). PAPS and sulfoconjugation. In Human cytosolic sulfotransferases (G.M Pacifici and M.W. Coughtrie, Eds.), pp.43-61. CRC Press, USA.

Seth, P., Lunetta, K.L., Bell, D.W., Gray, H., Nasser, S.M., Rhei, E., Kaelin, C.M., Iglehart, D.J., Marks, J.R., Garber, J.E., Haber. D.A. and Polyak, K. (2000). Phenol

sulfotransferases: hormonal regulation, polymorphism, and age of onset of breast cancer. *Cancer Res.* **60**, 6859-6863.

Stanley, E. L., Hume, R., Visser, T.J. and Coughtrie, M.W. (2001). Differential expression of sulfotransferase enzymes involved in thyroid hormone metabolism during human placental development. *J. Clin. Endocrinol. Metab.* **86**, 5944-5955.

Sundaram, R. S., Szumlanski, C., Otterness, D., Van Loon, J., and Weinshilboum, R.M. (1989). Human intestinal phenol sulfotransferase: assay conditions, activity levels and partial purification of the thermolabile form. *Drug Metabol. Dispos.* **17**, 255-264.

Surh, Y-J. (1998). Bioactivation of benzylic and allylic alcohols via sulfo-conjugation. *Chem. Biol. Interact.* **109**, 221-235.

Teubner, W., Pabel, U., Meinel, W., Coughtrie, M. W. H., Falany, C. N., Kretzschmar, M., Seidel, A., and Glatt, H. R. (1998). Characterisation of sulfotransferases in human colon mucosa and their expression in *Salmonella typhimurium* for the study of the activation of promutagens. *Naunyn-Schmiedeberg's Arch. Pharmacol.* **357**, 526.

Thorgeirsson, S. S., Glowinski, I. B. McManus, M.E (1983). Metabolism, mutagenicity and carcinogenicity of aromatic amines. *Reviews in Biochemical Toxicol.* **5**, 349-386.

Tong, M.H., Jiang, H., Liu, P., Lawson, J.A., Brass, L.F., and Song, W.C. (2005). Spontaneous fetal loss caused by placental thrombosis in estrogen sulfotransferase-deficient mice. *Nat. Med.* **11**, 153-9.

Tsoi, C., Falany, C.N., Morgenstern, R. and Swedmark, S. (2001a). Identification of a new subfamily of sulphotransferases: cloning and characterization of canine SULT1D1. *Biochem. J.* **356**, 891-897.

Varin, L. M., and Ibrahim, R. (1992). Novel flavonol 3-sulfotransferase. Purification, kinetic properties and partial amino acid sequence. *J. Biol. Chem.* **267**, 1858-1863.

Vargas, F., Frerot, O., Brion, F., Trung Tuong, M.D., Lafitte, A., and Gulat-Marnay, C. (1994). 3'-Phosphoadenosine 5'-phosphosulfate biosynthesis and the sulfation of cholecystokinin by the tyrosylprotein-sulfotransferase in rat brain tissue. *Chem. Biol. Interact.* **92**, 281-91.

Vietri, M., Pietrabissa, A., Mosca, F., Spisni, R., Pacifici, G. M (2003). Curcumin is a potent inhibitor of phenol sulfotransferase (SULT1A1) in human liver and extrahepatic tissues. *Xenobiotica* **33**, 357-363.

Walther, S. E., Dunbrack, R. L., and Raftogianis, R.B. (1999). Cloning, expression and characterization of a human sulfotransferase, SULT4A1, that represents a novel SULT family. *Proc. of the 9th North American ISSX meeting*, **15**, 195.

Weinshilboum, R. M., Adjei, A.A. (2005). Sulfate conjugation; Pharmacogenetics and Pharmacogenomics. In Human cytosolic sulfotransferases (G.M Pacifici and M.W. Coughtrie, Eds.), pp.61-78. CRC Press, USA.

Whittemore, R., L. Pearce, Pearce, L.B. and Roth, J.A. (1985). Purification and kinetic characterization of a dopamine-sulfating form of phenol sulfotransferase from human brain. *Biochem.* **24**, 2477-2482.

Whittemore, R. M., B. Pearce, *et al.* (1986). Purification and kinetic characterization of a phenol-sulfating form of phenol sulfotransferase from human brain. *Arch. Biochem. Biophys.* **249**, 464-471.

Wilborn, T. W., Comer, K.A., Dooley, T.P., Reardon, I.M., Henrikson, R.L. and Falany, C.N. (1993). Sequence analysis and expression of the cDNA for the phenol-sulfating form of human liver phenol sulfotransferase. *Mol. Pharm.* **43**, 70-77.

Wood, T.C., Aksoy, I.A., Aksoy, S., and Weinshilboum, R.M. (1994). Human liver thermolabile phenol sulfotransferase: cDNA cloning, expression and characterization. *Biochem. Biophys. Res. Commun.* **198**, 1119-1127.

Yang, Y.-S., Tsai, S.-W., and Lin, E-S. (1998). Effects of 3'-phosphoadenosine 5'-phosphate on the activity and folding of phenol sulfotransferase. *Chem.-Biol. Interact.* **109**, 129-135.

Yoshinari, K., Nagata, K., Ogino, M., Fujita, K., Shiraga, T., Iwasaki, K., Hata, T., Yamazoe, Y. (1998a). Molecular cloning and expression of an amine sulfotransferase cDNA: A new gene family of cytosolic sulfotransferases in mammals. *J. Biochem.* **123**, 479-486.

Yoshinari, K., Nagata, K., Shimada, M., and Yamazoe, Y. (1998b). Molecular characterization of ST1C1-related human sulfotransferase. *Carcinogenesis* **19**, 951-953.

Yoshinari, K., Petrotchenko, E.V., Pedersen, L.C., and Negishi, M. (2001). Crystal structure-based studies of cytosolic sulfotransferase. *J. Biochem. Mol. Toxicol.* **15**, 67-75.

Young, W. F., Jr., E. R. Laws, Jr. (1985). Human phenol sulfotransferase: correlation of brain and platelet activities. *J. Neurochem.* **44**, 1131-1137.

Zhang, H., Varmalova, O., Falany, F.M., and Leahy, T.S. (1998). Sulfuryl transfer: The catalytic mechanism of human estrogen sulfotransferase. *J. Biol. Chem.* **273**, 10888-10892.

Zhu, X., Veronese, M.E., Sansom, L.N., and McManus, M.E. (1993b). Molecular characterisation of a human aryl sulfotransferase cDNA. *Biochem. Biophys. Res. Commun.* **192**, 671-6.
