# Supplementary figures and images for: Human Sulfotransferases and Their Role in Chemical Metabolism
Source: Oxford University Press journal article supplement (doi:10.1093/toxsci/kfj061), 2005-12-01

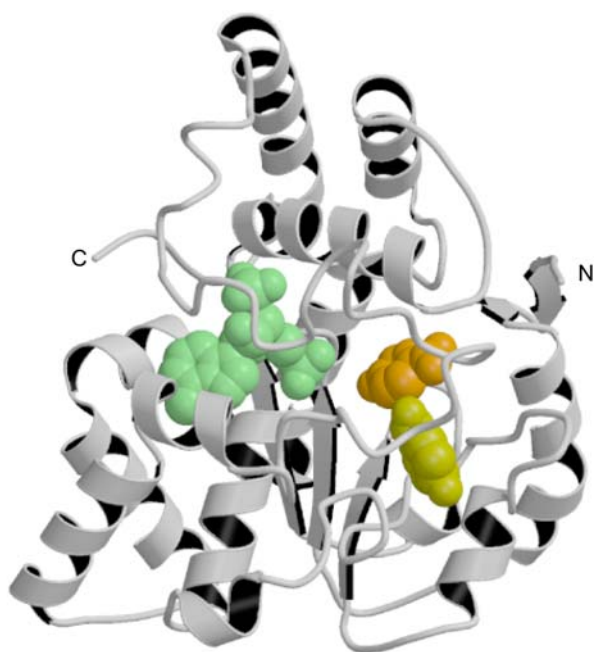

Figure 2

A

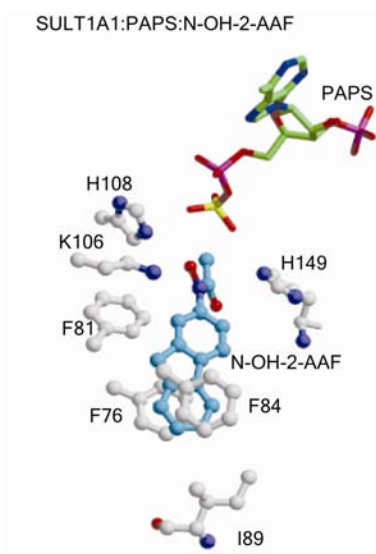

B

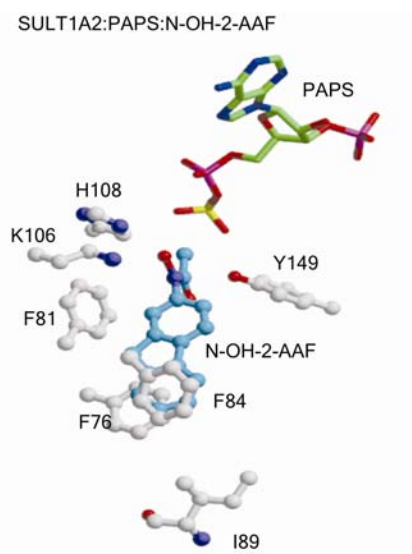

C

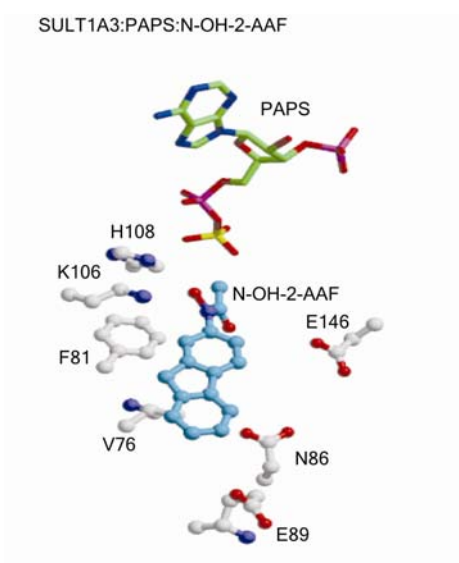

Figure 5

A

SULT1A1:PAPS:N-OH-PhIP

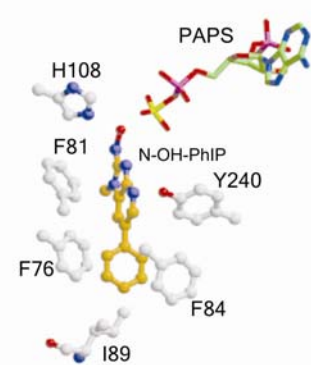

B

SULT1A2:PAPS:N-OH-PhIP

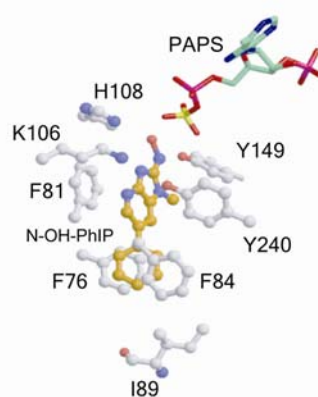

C

SULT1A3:PAPS:N-OH-PhIP

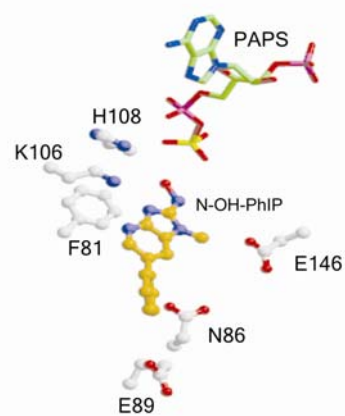

Figure 6

Supplement: kfj061_Supplementary_Data.zip [file kfj061_Supplementary_Data.zip]
